# Supplementary material
Source: publisher figshare collection journal article supplement (https://tandf.figshare.com/ndownloader/files/14244404)
Supplement: Supplementary file 1 [file 14244404]

Supplementary Figure 1. Effect of EPA intervention on IL-6 concentration

Supplementary Figure 2. Effect of EPA intervention on TNF-α concentration

Supplementary Figure 3. Effect of DHA intervention on IL-6 concentration

Supplementary Figure 4. Effect of EPA intervention on TNF-α concentration

Supplementary Figure 5. Sensitivity analysis of EPA intervention on SBP

Supplementary Figure 6. Sensitivity analysis of EPA intervention on DBP

Supplementary Figure 7. Sensitivity analysis of EPA intervention on CRP concentration

Supplementary Figure 8. Sensitivity analysis of EPA intervention on TNF-α concentration

Supplementary Figure 9. Sensitivity analysis of EPA intervention on IL-6 concentration

Supplementary Figure 10. Sensitivity analysis of DHA intervention on SBP

Supplementary Figure 11. Sensitivity analysis of DHA intervention on DBP

Supplementary Figure 12. Sensitivity analysis of DHA intervention on CRP concentration

Supplementary Figure 13. Sensitivity analysis of DHA intervention on TNF-α concentration

Supplementary Figure 14. Sensitivity analysis of DHA intervention on IL-6 concentration

Search strategy of the present study

| 1. eicosapentaenoic acid |
| --- |
| 2. EPA |
| 3. docosahexaenoic acid |
| 4. DHA |
| 5. (1 OR 2 OR 3 OR 4 OR) |
| 6. blood pressure |
| 7. BP |
| 8. systolic blood pressure |
| 9. SBP |
| 10. diastolic blood pressure |
| 11. DBP |
| 12. C-reactive protein |
| 13. CRP |
| 14. interleukin 6 |
| 15. IL-6 |
| 16. tumor necrosis factor alpha |
| 17. TNF-α |
| 18. interleukin |
| 19. inflammation |
| 20. (6 OR 7 OR 8 OR 9 OR 10 OR 11 OR 12 OR 12 OR 13 OR 14 OR 15 OR 16 OR 17 OR 18 OR 19 OR) |
| 21. 5 and 20 |
